# Supplementary material for: Skin Microcolumns as a Source of Paracrine Signaling Factors
Source: PubMed Central journal article supplement (PMC7047113; doi:10.1089/wound.2019.1045), 2020-02-07
Supplement: Supp_Table1.pdf [file Supp_Table1.pdf]

|                   |            |            |            |            |            |            |            |            |
|-------------------|------------|------------|------------|------------|------------|------------|------------|------------|
| CD58              | 0          | 207.579738 | 0          | 84.3701797 | 422.061327 | 601.368061 | 19.5784475 | 0          |
| CD6               | 0          | 0          | 0          | 0          | 0          | 0          | 0          | 0          |
| CD83              | 0          | 0          | 0          | 0          | 0          | 0          | 0          | 0          |
| CD84              | 0          | 0          | 0          | 0          | 0          | 0          | 0          | 0          |
| CD97              | 0          | 324.19324  | 0          | 232.934808 | 0          | 0          | 0          | 0          |
| CD99              | 376.912352 | 429.094863 | 425.025934 | 538.74099  | 507.207196 | 577.79205  | 550.548332 | 508.772114 |
| CDNF              | 0          | 0          | 4.47674973 | 16.6895462 | 0          | 0          | 0          | 0          |
| CDO               | 10.8432553 | 98.379832  | 136.678898 | 414.974294 | 0          | 164.950613 | 118.709519 | 15.3577215 |
| CEA               | 0          | 0          | 0          | 0          | 0          | 0          | 0          | 0          |
| CEACAM-1          | 24.2391136 | 0          | 0          | 52.0184127 | 192.262333 | 266.964268 | 113.103384 | 77.8480033 |
| CEACAM-5          | 0          | 0          | 0          | 0          | 0          | 0          | 0          | 0          |
| CF VII            | 0          | 44.3640028 | 0          | 0          | 0          | 0          | 0          | 0          |
| CF XIV            | 122.914117 | 0          | 0          | 0          | 0          | 0          | 0          | 0          |
| Chemerin          | 4018.41182 | 3751.72631 | 1304.56846 | 2156.06776 | 16.6444876 | 921.366829 | 442.180139 | 0          |
| CHI3L1            | 937.527631 | 980.255412 | 414.140569 | 328.429317 | 993.413069 | 1685.875   | 927.897595 | 732.703397 |
| CHST1             | 63.1863668 | 252.306855 | 44.9656016 | 626.798414 | 0          | 0          | 35.4363101 | 0          |
| CHST4             | 0          | 312.306229 | 33.0970236 | 1010.05135 | 0          | 0          | 0          | 0          |
| ciAP-2            | 0          | 84.2889497 | 61.464065  | 0          | 0          | 0          | 0          | 0          |
| CILP-1            | 0          | 125.939551 | 431.650778 | 958.995605 | 0          | 0          | 32.5378448 | 19.1004929 |
| Ck beta 8-1       | 14.4952121 | 15.8622711 | 0          | 36.2272626 | 0          | 0          | 0          | 0          |
| CLEC-1            | 0          | 0          | 0          | 0          | 0          | 0          | 0          | 0          |
| CLEC10A           | 0          | 0          | 0          | 0          | 0          | 0          | 0          | 0          |
| Clusterin         | 69.9532457 | 73.5770304 | 74.0331692 | 4.92742665 | 0          | 126.796818 | 0          | 0          |
| cMASP3            | 157.91687  | 144.228061 | 0          | 0          | 93.6010358 | 0          | 0          | 0          |
| CMG-2             | 0          | 0          | 0          | 0          | 0          | 0          | 0          | 0          |
| CNTF              | 0          | 0          | 0          | 0          | 0          | 0          | 0          | 0          |
| CNTF R alpha      | 0          | 0          | 0          | 0          | 0          | 0          | 0          | 0          |
| Common beta Chain | 0          | 0          | 53.9769275 | 11.8885995 | 0          | 0          | 8.29206091 | 0          |
| Contactin-1       | 36.525459  | 46.987697  | 17.9102638 | 34.2785598 | 39.4318935 | 42.1843726 | 68.2719076 | 42.1059398 |
| CREG              | 0          | 0          | 0          | 0          | 0          | 0          | 0          | 0          |
| CRIM1             | 0          | 1.68772993 | 19.9572637 | 16.7815999 | 262.85752  | 159.464099 | 99.8483177 | 31.6468967 |
| Cripto-1          | 10.6578293 | 13.5842619 | 11.0056553 | 13.8363551 | 0          | 0          | 0          | 0          |
| CRP               | 71.0590972 | 310.956909 | 120.368638 | 2311.9764  | 8.23950282 | 113.064114 | 9.10780177 | 365.748038 |
| CRTAC1            | 0          | 0          | 0          | 1364.33798 | 0          | 0          | 0          | 0          |
| CRTAM             | 0          | 0          | 0          | 0          | 0          | 0          | 0          | 0          |
| CTACK             | 91.5882457 | 250.62692  | 969.1      | 531.9      | 0          | 19.5895703 | 39.9       | 11.7       |
| CTLA4             | 0          | 0          | 0          | 0          | 0          | 0          | 0          | 0          |
| CXADR             | 0          | 3.9333831  | 0          | 9.22145095 | 233.311893 | 258.354165 | 302.425393 | 135.619108 |
| CXCL14            | 0          | 0          | 0          | 0          | 0          | 0          | 0          | 0          |
| CXCL16            | 73.4644966 | 155.5611   | 226.7      | 141.9      | 0          | 73.676364  | 56.6       | 0          |
| Cystatin A        | 5.16049659 | 27.9799296 | 58.8602611 | 16.1708658 | 241.282593 | 184.316698 | 110.206179 | 70.595333  |
| Cystatin B        | 2112.25809 | 2491.77113 | 1161.63653 | 1751.33664 | 3274.26139 | 2909.3045  | 1654.68778 | 1406.34608 |
| Cystatin C        | 643.124486 | 1201.98697 | 768.411382 | 1033.90889 | 326.582898 | 745.635869 | 439.297076 | 204.243013 |
| Cystatin E M      | 504.567617 | 430.747683 | 568.69715  | 672.094963 | 1115.13327 | 896.596046 | 1030.8718  | 1006.37202 |
| Cystatin SN       | 0          | 0          | 0          | 0          | 0          | 0          | 0          | 0          |
| Cytokeratin-8     | 0          | 0          | 0          | 0          | 0          | 0          | 0          | 0          |
| DAN               | 0          | 0          | 0          | 0          | 0          | 0          | 0          | 0          |
| DcR3              | 0          | 0          | 0          | 0          | 0          | 0          | 0          | 0          |
| Decorin           | 2672.76901 | 3169.1585  | 2876.13652 | 3428.14169 | 3065.06821 | 2818.26778 | 3113.39959 | 3075.8258  |
| Dectin-1          | 0          | 0          | 0          | 0          | 0          | 0          | 0          | 0          |
| Desmocollin-3     | 0          | 0          | 0          | 0          | 0          | 0          | 0          | 0          |
| Desmoglein 2      | 0          | 0          | 0          | 0          | 0          | 0          | 0          | 0          |
| Desmoglein-1      | 47.7930028 | 52.97418   | 92.7755663 | 30.9727041 | 143.126913 | 70.3265808 | 307.23432  | 94.2754896 |
| Desmoglein-3      | 111.218231 | 116.795519 | 37.3668241 | 61.7001054 | 436.671868 | 600.497537 | 347.360446 | 182.695085 |
| DKK-1             | 0          | 0          | 0          | 0          | 0          | 0          | 0          | 0          |
| Dkk-3             | 533.064282 | 1002.25457 | 756.236713 | 558.064434 | 2025.6876  | 974.116244 | 714.160003 | 199.363897 |
| Dkk-4             | 0          | 0.90890409 | 0          | 0          | 0          | 0          | 0          | 0          |
| DLL1              | 0          | 0          | 0          | 0          | 0          | 559.243543 | 0          | 0          |

|                    |            |            |            |            |            |            |            |            |   |
|--------------------|------------|------------|------------|------------|------------|------------|------------|------------|---|
| DNAM-1             | 0          | 0          | 0          | 0          | 0          | 0          | 0          | 0          | 0 |
| Dopa Decarboxylase | 0          | 9.38131246 | 10.9243424 | 3.9874832  | 0          | 0          | 0          | 0          | 0 |
| DPPII              | 307.939001 | 2012.37739 | 513.507123 | 1079.50718 | 4792.82923 | 10976.5226 | 2757.92027 | 3033.13483 |   |
| DPPIV              | 2349.03507 | 3060.96926 | 2120.0118  | 2603.076   | 11492.2779 | 13988.198  | 4256.54045 | 2254.87165 |   |
| DR3                | 0          | 0          | 0          | 0          | 0          | 0          | 0          | 0          | 0 |
| DR6                | 0          | 0          | 0.68289157 | 1.47209535 | 0          | 0          | 1.84170732 | 47.3456234 |   |
| DSPG3              | 0          | 20.4806949 | 0          | 0          | 0          | 0          | 0          | 0          | 0 |
| Dtk                | 0          | 24.2884918 | 0          | 0          | 0          | 0          | 0          | 0          | 0 |
| E-Cadherin         | 0          | 0          | 0          | 0          | 0          | 0          | 0          | 0          | 0 |
| E-Selectin         | 603.841102 | 0          | 0          | 2.65291633 | 457.00619  | 398.040613 | 0          | 139.021441 |   |
| ECM-1              | 0.71714647 | 1.06942291 | 23.2620971 | 44.4363414 | 0          | 0.10136266 | 0.08342515 | 2.45440649 |   |
| EDA-A2             | 0          | 0          | 0          | 0          | 0          | 0          | 0          | 0          | 0 |
| EDAR               | 45.9997977 | 51.4086272 | 10.080224  | 19.5926523 | 0          | 0          | 0          | 0          | 0 |
| EG-VEGF            | 0          | 0          | 0          | 24.5617308 | 0          | 0          | 9.40647947 | 1.66334833 |   |
| EGF                | 0          | 0          | 0.35471644 | 0          | 0          | 0          | 0.0061784  | 0.00395623 |   |
| EGF R              | 9.00170887 | 34.5189753 | 44.1578287 | 28.0998112 | 562.339961 | 807.522214 | 1084.80414 | 505.794328 |   |
| EMMPRIN            | 28.3958479 | 43.5731667 | 242.735347 | 140.806642 | 350.160729 | 309.012927 | 613.104321 | 409.411289 |   |
| EMR2               | 0          | 2.83572104 | 17.4070673 | 3.55172942 | 0          | 0          | 0          | 0          | 0 |
| ENA-78             | 2133.12582 | 1465.91774 | 581.7      | 153.5      | 65.3742333 | 1436.40968 | 122        | 0          |   |
| Endocan            | 0          | 0          | 0          | 0          | 3.31619018 | 0.62933178 | 0          | 0.42436842 |   |
| Endoglin           | 0          | 0          | 0          | 0          | 0          | 8.9555163  | 0.19584342 | 4.35029356 |   |
| Endoglycan         | 0          | 0          | 0          | 0          | 0          | 0          | 0          | 0          | 0 |
| Eotaxin            | 2.82319592 | 1.00792313 | 0          | 0          | 0          | 0          | 0          | 0          | 0 |
| Eotaxin-2          | 0          | 0          | 0          | 0          | 0          | 0          | 0          | 0          | 0 |
| Eotaxin-3          | 0          | 0          | 0          | 0          | 0          | 0          | 0          | 0          | 0 |
| EpCAM              | 0          | 0          | 0          | 0          | 0          | 0          | 0          | 0          | 0 |
| EphA1              | 321.598747 | 167.807855 | 0          | 29.9173287 | 344.843363 | 0          | 61.360191  | 0          |   |
| EphA2              | 17.6574324 | 0          | 37.4171481 | 0          | 66.5761594 | 42.8102892 | 51.4110658 | 29.7460734 |   |
| EphB4              | 0          | 0          | 0          | 16.8784001 | 124.969321 | 77.1554744 | 161.753301 | 109.673529 |   |
| EphB6              | 89.2680685 | 39.1132207 | 0          | 40.7224078 | 0          | 0          | 0          | 0          | 0 |
| Ephrin-A4          | 146.094048 | 87.1585171 | 0          | 0          | 133.577742 | 0          | 0          | 0          | 0 |
| Ephrin-B3          | 493.129336 | 537.891077 | 929.448185 | 2494.84231 | 612.925095 | 578.792158 | 1252.0801  | 959.290023 |   |
| Epiregulin         | 860.652722 | 1281.4501  | 0          | 0          | 369.99666  | 96.5521689 | 0          | 0          | 0 |
| Epo R              | 0          | 40.5631941 | 0          | 0          | 0          | 0          | 0          | 0          | 0 |
| ErbB2              | 0          | 0          | 5.2381835  | 0          | 0          | 0          | 0          | 0          | 0 |
| ErbB3              | 14.1008698 | 0          | 0          | 0          | 1365.74849 | 947.289431 | 1251.00634 | 443.688333 |   |
| ErbB4              | 0          | 0          | 67.8529532 | 0          | 0          | 0          | 10.0549373 | 0          | 0 |
| ESAM               | 0          | 0          | 0          | 0          | 0          | 0          | 0          | 0          | 0 |
| FABP1              | 0          | 0          | 91.2158379 | 0          | 0          | 0          | 0          | 0          | 0 |
| FABP2              | 12.4625459 | 36.3260463 | 0          | 63.4919775 | 0          | 0          | 0          | 0          | 0 |
| FAP                | 72.2490562 | 78.8391636 | 207.092002 | 182.696435 | 124.638948 | 303.345148 | 370.41528  | 83.0111325 |   |
| Fas                | 9.19774136 | 0          | 0          | 0          | 4.11885237 | 9.46315811 | 0          | 1.4360483  |   |
| FAS L              | 0          | 0          | 0          | 0          | 0          | 0          | 0          | 0          | 0 |
| FCAR               | 0          | 0          | 0          | 10.2998924 | 0          | 0          | 0          | 0          | 0 |
| Fcg RIIBC          | 78.7632701 | 169.783743 | 0          | 165.163442 | 0          | 0          | 0          | 0          | 0 |
| FCRL1              | 0          | 0          | 0          | 64.5480604 | 0          | 0          | 0          | 0          | 0 |
| FCRL2              | 0          | 0          | 0          | 0          | 0          | 0          | 0          | 0          | 0 |
| Ferritin           | 0          | 0          | 84168.4973 | 68763.124  | 0          | 0          | 88757.3564 | 25112.1677 |   |
| Fetuin A           | 47548.1715 | 51043.6243 | 65656.7881 | 33867.9364 | 31948.461  | 38220.0073 | 27071.4196 | 7237.2992  |   |
| FGF-12             | 29.8868355 | 29.5207157 | 0          | 0          | 31.6605152 | 5.71104347 | 0          | 0          | 0 |
| FGF-17             | 185.003757 | 192.880866 | 94.3452561 | 80.125259  | 0          | 0          | 0          | 0          | 0 |
| FGF-19             | 0          | 0          | 0          | 0          | 0          | 0          | 0          | 0          | 0 |
| FGF-20             | 0          | 0          | 0          | 7.71369775 | 0          | 0          | 1.12824903 | 9.58863876 |   |
| FGF-21             | 0          | 0          | 0          | 0          | 0          | 0          | 0          | 0          | 0 |
| FGF-23             | 54.095293  | 0          | 3.8626458  | 0          | 0          | 0          | 0          | 0          | 0 |
| FGF-4              | 0          | 0          | 0          | 0          | 0          | 0          | 72.6720579 | 0          | 0 |
| FGF-5              | 0          | 0          | 0          | 0          | 0          | 0          | 0          | 0          | 0 |
| FGF-6              | 2.58777094 | 58.4033555 | 0          | 0          | 0          | 0          | 0          | 0          | 0 |



|              |            |            |            |            |            |            |            |            |   |
|--------------|------------|------------|------------|------------|------------|------------|------------|------------|---|
| I-309        | 7.33710216 | 0          | 0          | 0          | 0          | 0          | 0          | 0          | 0 |
| I-TAC        | 0          | 0          | 23.6       | 0          | 0          | 0          | 0          | 0          | 0 |
| ICAM-1       | 155.809791 | 282.802185 | 231.575716 | 299.162403 | 398.181603 | 803.231281 | 472.647826 | 305.474693 |   |
| ICAM-2       | 227.773414 | 197.485392 | 982.393052 | 332.285855 | 0          | 0          | 0          | 0          | 0 |
| ICAM-3       | 0          | 0          | 0          | 0          | 0          | 0          | 0          | 0          | 0 |
| ICOS         | 0          | 0          | 0          | 0          | 0          | 0          | 0          | 0          | 0 |
| IFN-gamma R1 | 43.1417211 | 13.9518248 | 0          | 4.86223774 | 0          | 0          | 0          | 0          | 0 |
| IFNab R2     | 0          | 0          | 0          | 0          | 0          | 0          | 0          | 0          | 0 |
| IFNg         | 1.17801281 | 0.63516384 | 0          | 0          | 0          | 0          | 5.56235854 | 0.93035413 |   |
| IgA          | 14804.5045 | 23988.1041 | 41730.6078 | 66098.3883 | 20022.9399 | 37269.5091 | 12400.7225 | 13564.5323 |   |
| IgD          | 2416.16947 | 2721.28329 | 462.03848  | 793.667108 | 4949.40268 | 2165.63442 | 954.523091 | 30.0767011 |   |
| IgE          | 2107.78112 | 236.268813 | 834.402425 | 720.4493   | 3567.25707 | 2272.96155 | 771.973748 | 1325.13707 |   |
| IGF-1        | 0          | 0          | 0          | 0          | 0          | 0          | 0          | 0          | 0 |
| IGF-1R       | 0          | 0          | 0          | 0          | 0          | 0          | 0          | 0          | 0 |
| IGF-2        | 24.9351033 | 98.5183254 | 0          | 0          | 0          | 0          | 0          | 0          | 0 |
| IGF-2R       | 0          | 0          | 0          | 0          | 0          | 0          | 0          | 0          | 0 |
| IGFBP-1      | 0          | 116.081968 | 21.6206402 | 0          | 0          | 99.9024006 | 8.07125951 | 0          | 0 |
| IGFBP-2      | 1440.56733 | 1164.24905 | 911.788811 | 552.182669 | 0          | 48.9020459 | 0          | 117.337519 |   |
| IGFBP-3      | 662.329714 | 111.111832 | 836.857769 | 879.736513 | 0          | 0          | 59.7919948 | 874.975286 |   |
| IGFBP-4      | 664.907657 | 1983.52549 | 0          | 0          | 3241.88107 | 5100.86966 | 0          | 0          | 0 |
| IGFBP-5      | 598.37105  | 0          | 0          | 0          | 0          | 0          | 0          | 0          | 0 |
| IGFBP-6      | 18442.8601 | 20730.5432 | 21360.7313 | 34640.8759 | 1769.04598 | 8460.7594  | 10573.4325 | 6288.08284 |   |
| IgG1         | 19925.9064 | 70904.9022 | 35391.1243 | 56810.4538 | 55593.8974 | 99085.8558 | 29834.3371 | 6948.08169 |   |
| IgG2         | 4144.18293 | 26804.5109 | 0          | 0          | 28620.9887 | 32784.9844 | 4344.03198 | 2857.28627 |   |
| IgG3         | 638.810008 | 1076.78737 | 374.865616 | 187.332607 | 939.328403 | 1365.8538  | 516.356884 | 31.7899934 |   |
| IgG4         | 3438.85343 | 2370.56698 | 376.459553 | 1011.32163 | 2183.50039 | 4872.17974 | 113.992398 | 195.135266 |   |
| IgM          | 3485.9746  | 7118.15863 | 4940.95226 | 4156.31267 | 6189.68542 | 10260.8582 | 2416.3047  | 1084.3097  |   |
| IL-1 F10     | 0          | 0          | 0          | 0          | 0          | 0          | 0          | 0          | 0 |
| IL-1 F5      | 0          | 0          | 0          | 0          | 171.989833 | 51.5206411 | 1.43352742 | 33.4588349 |   |
| IL-1 F6      | 467.135553 | 449.029821 | 0          | 0          | 0          | 0          | 0          | 0          | 0 |
| IL-1 F7      | 256.182057 | 612.893222 | 255.736738 | 0          | 39.8538511 | 362.367794 | 255.150324 | 248.316773 |   |
| IL-1 F8      | 0          | 0          | 0          | 0          | 0          | 0          | 0          | 0          | 0 |
| IL-1 F9      | 1762.82662 | 646.051538 | 0          | 0          | 1954.05906 | 1898.72553 | 0          | 0          | 0 |
| IL-1 R3      | 89.5637609 | 108.905875 | 240.850835 | 493.207666 | 52.2946781 | 71.4699476 | 57.2467581 | 8.55765735 |   |
| IL-1 R4      | 0          | 8.4953395  | 148.315221 | 0          | 571.001562 | 2214.08694 | 4551.3537  | 859.664805 |   |
| IL-1 R5      | 0          | 0          | 0          | 0          | 0          | 0          | 0          | 0          | 0 |
| IL-1 R6      | 0          | 0          | 0          | 0          | 0          | 0          | 0          | 0          | 0 |
| IL-1 RI      | 3.1834847  | 0          | 0          | 0          | 0.06300473 | 1.95027    | 0          | 0          | 0 |
| IL-1 RII     | 0          | 0          | 0          | 0          | 463.445307 | 243.529944 | 906.02522  | 0.98031864 |   |
| IL-10        | 1.09807472 | 0.62646096 | 0          | 0          | 0          | 2.17384459 | 0.23340425 | 0          | 0 |
| IL-10 Ra     | 0          | 0          | 0          | 0          | 0          | 0          | 0          | 0          | 0 |
| IL-10 Rb     | 0          | 0          | 0          | 0          | 0          | 0          | 0          | 0          | 0 |
| IL-11        | 10.9052768 | 12.3665821 | 0          | 0          | 0          | 0          | 0          | 0          | 0 |
| IL-12p40     | 0.56103018 | 0.58601894 | 2.12324928 | 0          | 0          | 0          | 0          | 0.07453738 |   |
| IL-12p70     | 0.29006599 | 0.3506308  | 0          | 0          | 0          | 0          | 0          | 0          | 0 |
| IL-13        | 18.9431607 | 12.3268318 | 0.2190329  | 0          | 0          | 1.20343573 | 1.09349412 | 0.30529413 |   |
| IL-13 R1     | 0          | 0          | 0          | 0          | 0          | 0          | 0          | 0          | 0 |
| IL-13 R2     | 0          | 0          | 0          | 0          | 0          | 0          | 0          | 0          | 0 |
| IL-15        | 12.6120676 | 5.60913933 | 0          | 0          | 0          | 0          | 15.2698423 | 0          | 0 |
| IL-15 R      | 0          | 0          | 0          | 0          | 0          | 0          | 0          | 0          | 0 |
| IL-16        | 14.8681514 | 22.8214942 | 13.720995  | 8.8490245  | 17.0326163 | 35.7031114 | 13.1516346 | 0          | 0 |
| IL-17        | 6.37954321 | 0          | 0          | 0          | 0          | 0          | 0          | 0          | 0 |
| IL-17B       | 0          | 0          | 7.34295393 | 0          | 0          | 0          | 0          | 0          | 0 |
| IL-17B R     | 0          | 0          | 0          | 0          | 0          | 0          | 0          | 0          | 0 |
| IL-17C       | 0          | 0          | 0          | 0          | 0          | 0          | 0          | 0          | 0 |
| IL-17E       | 18.8590301 | 0          | 0          | 0          | 0          | 0          | 0          | 0          | 0 |
| IL-17F       | 0          | 0          | 0          | 0          | 0          | 2.06941101 | 0          | 0          | 0 |
| IL-17R       | 0          | 0          | 0          | 7.02429549 | 0          | 0          | 0          | 0.84153296 |   |

|                  |            |            |            |            |            |            |            |            |
|------------------|------------|------------|------------|------------|------------|------------|------------|------------|
| IL-18            | 0          | 0          | 0          | 24.5444363 | 15.8171347 | 0          | 1.40598986 | 20.7870937 |
| IL-18 BPa        | 0          | 0          | 0          | 0          | 0          | 0          | 0          | 0          |
| IL-18 Rb         | 0          | 0          | 0          | 0          | 0          | 0          | 0          | 0          |
| IL-1a            | 6.37345585 | 5.30687961 | 0          | 0          | 14.5290611 | 24.4815387 | 0          | 0          |
| IL-1b            | 18.0485827 | 19.3065728 | 52.1898352 | 52.9584695 | 13.5716183 | 14.9011325 | 63.2931918 | 49.5119432 |
| IL-1ra           | 41.8972977 | 72.3771984 | 0          | 0          | 160.82707  | 245.430558 | 28.5218755 | 10.2449192 |
| IL-2             | 1.53085788 | 1.2880128  | 0          | 0          | 0          | 0          | 2.30719881 | 0          |
| IL-2 Ra          | 0          | 0          | 0          | 0          | 0          | 0          | 0          | 0          |
| IL-2 Rb          | 0          | 0          | 0          | 0          | 0          | 0          | 0          | 0          |
| IL-2 Rg          | 225.492212 | 0          | 914.105072 | 426.826173 | 371.374862 | 626.50003  | 1041.48365 | 598.934117 |
| IL-20            | 0          | 13.8557238 | 0          | 0          | 2.04318233 | 67.1657887 | 0          | 0          |
| IL-20 Ra         | 0          | 0          | 0          | 0          | 0          | 0          | 0          | 0          |
| IL-21            | 0          | 0          | 0          | 0          | 0          | 0          | 0          | 0          |
| IL-21R           | 0          | 0          | 0          | 0          | 0          | 44.8340693 | 0          | 0          |
| IL-22 R alpha 1  | 65.4944809 | 41.9495969 | 11.3755547 | 44.3060281 | 36.5123628 | 48.1850232 | 6.49323658 | 0          |
| IL-22BP          | 1559.28519 | 3217.71237 | 2697.57633 | 1606.5841  | 0          | 0          | 0          | 0          |
| IL-23            | 0          | 0          | 39.9945851 | 28.8231445 | 0          | 0          | 0          | 0          |
| IL-23 R          | 21.1584063 | 31.7610607 | 21.4971898 | 31.9641442 | 18.7279762 | 19.7788286 | 24.0263889 | 0          |
| IL-24            | 0          | 0          | 0          | 0          | 0          | 77.645148  | 0          | 0          |
| IL-27            | 0          | 0          | 0          | 0          | 0          | 0          | 0          | 0          |
| IL-27 Ra         | 0          | 0          | 79.5099172 | 0          | 0          | 0          | 0          | 0          |
| IL-28A           | 0          | 0.08480148 | 0          | 0          | 0          | 1.40642734 | 0          | 0          |
| IL-29            | 0          | 0          | 0          | 0          | 0          | 0          | 0          | 0          |
| IL-3             | 0          | 0          | 8.93183162 | 4.24262685 | 0          | 0          | 0          | 0          |
| IL-31            | 143.560918 | 40.8329406 | 0          | 0          | 0          | 0          | 0          | 0          |
| IL-31 RA         | 80.7627116 | 29.7643935 | 16.0276434 | 38.0972723 | 22.0067787 | 0          | 0          | 0          |
| IL-32 alpha      | 0          | 0          | 0          | 0          | 0          | 0          | 0          | 0          |
| IL-33            | 0          | 27.1112311 | 114.947386 | 147.508764 | 0.06823498 | 333.662872 | 24.7368175 | 42.9147371 |
| IL-34            | 0          | 0          | 0          | 0          | 0          | 0          | 0          | 0          |
| IL-4             | 2.74230113 | 0          | 0          | 0          | 0          | 0          | 0          | 0          |
| IL-4 Ra          | 9.86190329 | 14.63259   | 2.3267981  | 0          | 12.890898  | 25.302187  | 11.0059385 | 5.02184453 |
| IL-5             | 36.4591835 | 25.4321639 | 0          | 0          | 0          | 0          | 0          | 0          |
| IL-5 Ra          | 0          | 0          | 0          | 0          | 0          | 0          | 0          | 0          |
| IL-6             | 682.925779 | 837.364339 | 179.903286 | 141.612516 | 558.250548 | 882.203786 | 154.956009 | 97.6646583 |
| IL-6R            | 49.7547976 | 51.2583899 | 70.1116313 | 133.881104 | 40.5824047 | 60.0969755 | 90.3378099 | 37.1288999 |
| IL-7             | 6.31545963 | 3.02530326 | 0          | 0          | 0          | 0          | 0.59313794 | 0          |
| IL-7 R alpha     | 28.2563468 | 46.0848146 | 41.0152814 | 105.807696 | 18.0100186 | 32.7464988 | 9.66722252 | 4.0364337  |
| IL-8             | 138.162717 | 111.739574 | 37.2204049 | 16.6175097 | 228.881436 | 333.879881 | 16.1993447 | 42.6446641 |
| IL-9             | 179.513541 | 136.53164  | 0          | 0          | 0          | 0          | 0          | 0          |
| ILT2             | 0          | 0          | 9.9428453  | 19.4334104 | 0          | 0          | 0          | 0          |
| Insulin          | 0          | 0          | 0          | 0          | 0          | 0          | 0          | 0          |
| Insulin R        | 0          | 0          | 89.5903177 | 230.305204 | 0          | 0          | 59.8399921 | 0          |
| Integrin alpha 5 | 0          | 0          | 0          | 0          | 0          | 0          | 0          | 0          |
| IP-10            | 2.18929456 | 0          | 0          | 0          | 0          | 0          | 2.7        | 0          |
| Jagged 1         | 0          | 0          | 0          | 0          | 0          | 0          | 0          | 0          |
| Jagged 2         | 0          | 0          | 0          | 171.810924 | 0          | 0          | 0          | 0          |
| JAM-A            | 0          | 0.24688906 | 0          | 19.9955458 | 0          | 15.6985931 | 17.9621426 | 0          |
| JAM-B            | 0          | 0          | 0          | 0          | 0          | 0          | 0          | 0          |
| JAM-C            | 52.622955  | 216.638285 | 408.294217 | 144.355705 | 977.418479 | 1887.33925 | 1421.17075 | 1485.61993 |
| Kallikrein 14    | 23.7071858 | 4.90789059 | 15.0867573 | 4.08636479 | 0          | 4.62157937 | 0          | 0          |
| Kallikrein 5     | 447.477493 | 634.350289 | 1773.17729 | 419.078854 | 4118.16044 | 3746.57125 | 4741.90956 | 1490.3887  |
| Kallikrein 7     | 148.815429 | 242.91979  | 43.4168522 | 106.92599  | 722.166262 | 650.117845 | 484.514412 | 180.195705 |
| Kirrel3          | 0          | 0          | 0          | 145.419116 | 0          | 0          | 0          | 0          |
| KLF4             | 0          | 0          | 0          | 710.77618  | 0          | 0          | 0          | 0          |
| L-Selectin       | 0          | 0          | 296.320416 | 651.847575 | 0          | 0          | 0          | 0          |
| L1CAM-2          | 0          | 0          | 0          | 0          | 0          | 0          | 0          | 0          |
| LAG-3            | 0          | 0          | 0          | 0          | 0          | 0          | 0          | 0          |
| LAIR1            | 0          | 0          | 0          | 173.359063 | 0          | 0          | 0          | 0          |

|              |            |            |            |            |            |            |            |            |   |
|--------------|------------|------------|------------|------------|------------|------------|------------|------------|---|
| LAMP         | 0          | 129.706504 | 0          | 0          | 0          | 0          | 0          | 0          | 0 |
| LAMP1        | 0          | 20.7476972 | 0          | 307.023177 | 0          | 751.519288 | 641.112027 | 353.331919 |   |
| Langerin     | 0          | 0          | 0          | 0          | 0          | 0          | 0          | 0          | 0 |
| LAP(TGFb1)   | 27.6921147 | 42.8075854 | 82.233267  | 43.3521686 | 134.504979 | 163.020095 | 88.6291538 | 0          | 0 |
| Layilin      | 0          | 0          | 0          | 0          | 0          | 0          | 0          | 0          | 0 |
| LDL R        | 0          | 0          | 0          | 0          | 59.5703007 | 84.7056412 | 26.2853715 | 3.72588054 |   |
| Legumain     | 4221.02911 | 2196.51325 | 3835.57295 | 4116.56401 | 8083.17547 | 9008.89119 | 6828.71294 | 2176.95154 |   |
| Leptin       | 457.129929 | 22.410836  | 127.530592 | 29.7420523 | 0          | 26.3841823 | 0          | 0          | 0 |
| Leptin R     | 0          | 0          | 0          | 0          | 0          | 0          | 0          | 0          | 0 |
| LH           | 95.8574329 | 32.3360874 | 0          | 0          | 0          | 0          | 0          | 0          | 0 |
| LIF          | 16.9455693 | 0          | 0          | 0          | 0          | 0          | 0          | 0          | 0 |
| LIF R alpha  | 0          | 0          | 23.8225703 | 28.2556927 | 0          | 0          | 0          | 0          | 0 |
| LIGHT        | 0          | 10.8181314 | 0          | 0          | 0          | 0          | 0          | 0          | 0 |
| LIMPII       | 0          | 0          | 0.1225736  | 0          | 0          | 12.6408164 | 69.9409852 | 16.0273718 |   |
| Lipocalin-1  | 8.49759669 | 14.3634043 | 0.31415208 | 0.04971683 | 0          | 0          | 0          | 0          | 0 |
| Lipocalin-2  | 52.1397896 | 367.957712 | 221.290951 | 184.917735 | 525.980339 | 1144.33852 | 697.54971  | 154.840769 |   |
| LOX-1        | 0          | 0          | 0          | 0          | 0          | 0          | 0          | 0          | 0 |
| LRIG3        | 0          | 100.714874 | 0          | 0          | 0          | 0          | 0          | 0          | 0 |
| LRP-6        | 0          | 307.694934 | 22.177533  | 0          | 0          | 0          | 0          | 0          | 0 |
| LTbR         | 0          | 0          | 4.71657498 | 2.18829373 | 0          | 0          | 8.26249242 | 0.30996094 |   |
| Lumican      | 1883.02917 | 3395.39601 | 4531.72307 | 2939.82481 | 1021.81706 | 2806.28427 | 1104.86444 | 3040.02285 |   |
| Lymphotactin | 54.7928578 | 0          | 0          | 0          | 0          | 0          | 0          | 0          | 0 |
| LYVE-1       | 328.783186 | 280.170885 | 484.78425  | 492.407353 | 305.179244 | 288.447019 | 396.307895 | 293.982828 |   |
| Marapsin     | 0          | 0          | 0          | 0          | 96.5339872 | 91.4696622 | 130.296827 | 0          | 0 |
| Matrilin-3   | 0          | 0          | 0          | 0          | 0          | 0          | 0          | 0          | 0 |
| Matriptase   | 0          | 0          | 0          | 0          | 0          | 0          | 0          | 0          | 0 |
| MBL          | 207.141375 | 89.2604223 | 130.902998 | 224.380502 | 231.936602 | 97.1561421 | 81.1065881 | 34.7835112 |   |
| MCP-1        | 343.751597 | 338.519959 | 164.881384 | 203.084552 | 247.491864 | 353.911135 | 162.881918 | 62.6990215 |   |
| MCP-2        | 1.42916728 | 4.68448006 | 0          | 0          | 0          | 0          | 0          | 0          | 0 |
| MCP-3        | 0          | 1.79515154 | 0          | 0          | 0          | 0          | 0          | 0          | 0 |
| MCP-4        | 1.75146453 | 0          | 0          | 0          | 0          | 0.04115385 | 0          | 0          | 0 |
| MCSF         | 1.32626831 | 0.7990134  | 0          | 0.97794543 | 0          | 0          | 0          | 0          | 0 |
| MCSF R       | 203.595609 | 410.42288  | 590.16903  | 1527.82703 | 135.380721 | 349.198195 | 272.726815 | 76.9343041 |   |
| MDC          | 29.0671292 | 116.529452 | 202.6      | 76.8       | 0          | 10.1399157 | 20.3       | 0          | 0 |
| MDGA1        | 0          | 0          | 0          | 149.057271 | 0          | 0          | 0          | 0          | 0 |
| MDM2         | 77.7673281 | 129.879452 | 0          | 0          | 0          | 0          | 0          | 0          | 0 |
| MEP1B        | 0          | 0          | 0          | 0          | 0          | 0          | 0          | 0          | 0 |
| MEPE         | 0          | 0          | 0          | 0          | 0          | 0          | 0          | 0          | 0 |
| MeprinA      | 580.822347 | 60.0682557 | 0          | 0          | 167.26844  | 0          | 0          | 0          | 0 |
| Mer          | 0          | 0          | 0          | 0          | 0          | 0          | 0          | 0          | 0 |
| Mesothelin   | 0          | 132.092014 | 115.662224 | 41.1027621 | 0          | 42.8796902 | 0          | 0          | 0 |
| MFRP         | 0          | 0          | 0          | 0          | 0          | 0          | 0          | 0          | 0 |
| MICA         | 8.18211362 | 7.07364716 | 38.6351516 | 33.7600275 | 6.95814336 | 10.0503072 | 44.2726556 | 43.9236255 |   |
| MICB         | 0          | 39.8699825 | 0          | 0          | 0          | 0          | 0          | 0          | 0 |
| Midkine      | 36.6498345 | 97.4798478 | 65.4532313 | 79.5471639 | 31.4280491 | 35.7929643 | 40.9484294 | 24.5904838 |   |
| MIF          | 68.8188811 | 136.24068  | 9004.5     | 3151.2     | 112.041996 | 333.032845 | 2679.5     | 1144.8     |   |
| MIG          | 554.226237 | 731.258038 | 14.0788742 | 64.0383203 | 110.587118 | 202.475558 | 13.3669939 | 11.6122442 |   |
| MIP-1a       | 138.878176 | 25.318684  | 33.8054922 | 83.7287627 | 0          | 18.4647791 | 2.55609474 | 3.40037716 |   |
| MIP-1b       | 26.2973931 | 7.20931834 | 1.57201723 | 12.2237052 | 2.18981716 | 2.67193898 | 0          | 0          | 0 |
| MIP-1d       | 5.40409476 | 6.40059276 | 0          | 0          | 0          | 0          | 0          | 0          | 0 |
| MIP-3a       | 1.03040094 | 0          | 3.6        | 0          | 0          | 0          | 0          | 0          | 0 |
| MIP-3b       | 2.21219672 | 0          | 0          | 0          | 0          | 0          | 0          | 0          | 0 |
| MIS RII      | 0          | 0          | 0          | 0          | 0          | 0          | 0          | 0          | 0 |
| MMP-1        | 13665.2565 | 17675.5355 | 13093.8863 | 10536.866  | 41540.9474 | 44396.6035 | 42122.1088 | 22827.1264 |   |
| MMP-10       | 108.444107 | 107.417983 | 142.370904 | 234.46238  | 2722.80837 | 3010.5318  | 1981.94434 | 574.047069 |   |
| MMP-13       | 0          | 0          | 159.040796 | 126.765163 | 0          | 0          | 83.4269203 | 0          | 0 |
| MMP-2        | 0          | 0          | 0          | 0          | 3326.36961 | 0          | 0          | 0          | 0 |
| MMP-3        | 9559.59089 | 3849.67629 | 3562.18101 | 4096.55815 | 22264.4491 | 20598.3068 | 17192.392  | 10144.6662 |   |



|                 |            |            |            |            |            |            |            |            |
|-----------------|------------|------------|------------|------------|------------|------------|------------|------------|
| MMP-7           | 844.481743 | 680.184246 | 1509.93702 | 340.385731 | 413.314226 | 398.030773 | 515.616143 | 0          |
| MMP-8           | 0          | 0          | 0          | 0          | 0          | 0          | 0          | 0          |
| MMP-9           | 285.717555 | 306.105239 | 589.035952 | 2380.72327 | 693.28512  | 2624.13746 | 1236.58705 | 167.131717 |
| MPIF-1          | 0          | 0          | 0          | 0          | 0          | 0          | 0          | 0          |
| MSP             | 88.6173793 | 0          | 50.4       | 8.3        | 0          | 0          | 0          | 0          |
| MSP R           | 0          | 60.1919444 | 0          | 0          | 19.5510591 | 0          | 0          | 11.460007  |
| N-Cadherin      | 0          | 364.239936 | 18.6068632 | 0          | 24.2197423 | 0          | 0          | 0          |
| NAP-2           | 29.9383883 | 23.9387303 | 286.3      | 40.4       | 7.0373982  | 20.6908487 | 13.7       | 2.2        |
| NCAM-1          | 0          | 0          | 75.8347803 | 0          | 0          | 0          | 0          | 0          |
| Nectin-1        | 807.785783 | 789.687336 | 0          | 1259.14008 | 0          | 0          | 0          | 0          |
| Nectin-3        | 0          | 0          | 0          | 0          | 0          | 0          | 0          | 0          |
| Nectin-4        | 0          | 0          | 0          | 0          | 0          | 0          | 0          | 0          |
| Nepriylisin     | 0          | 0          | 0          | 0          | 0          | 0          | 0          | 0          |
| Nepriylisin-2   | 381.67501  | 613.98897  | 0          | 0          | 388.085206 | 0          | 0          | 0          |
| Neurexin 3 beta | 0          | 19.5261992 | 0          | 0          | 0          | 0          | 0          | 0          |
| Neuropilin-2    | 0          | 0          | 54.0072736 | 0          | 0          | 0          | 0          | 0          |
| Neurturin       | 0          | 0          | 24.7910393 | 23.7222328 | 0          | 0          | 0          | 7.86895786 |
| NGF R           | 23.4673831 | 0          | 0          | 1.76224957 | 0          | 0          | 0          | 6.47242459 |
| Nidogen-1       | 3604.00735 | 1611.55258 | 4700.16829 | 3912.5672  | 6422.48615 | 9821.48804 | 9642.64084 | 7847.25454 |
| Nidogen-2       | 0          | 0          | 376.710987 | 62.7194455 | 0          | 0          | 706.517576 | 355.691024 |
| NKp30           | 15.9921179 | 110.112804 | 1.51507032 | 0          | 0          | 0          | 0          | 0          |
| NKp44           | 0          | 0          | 0          | 0          | 8.14958995 | 0          | 0          | 0          |
| Nogo Receptor   | 464.103383 | 410.083794 | 0          | 76.7116617 | 0          | 0          | 0          | 0          |
| Notch-1         | 0          | 0          | 0          | 0          | 0          | 0          | 0          | 0          |
| Notch-3         | 0          | 0          | 23.0153335 | 6.39675603 | 57.1785667 | 54.5104651 | 47.5824038 | 3.3042726  |
| NOV             | 330.241644 | 404.243372 | 653.864998 | 236.720578 | 308.035511 | 908.884177 | 375.36226  | 98.2982153 |
| NrCAM           | 48.1009446 | 0          | 0          | 0          | 0          | 0          | 0          | 0          |
| NRG1-b1         | 0          | 0          | 0          | 2.48406465 | 0          | 0          | 0          | 0.2572272  |
| NSE             | 1991.75922 | 4215.74463 | 3070.13829 | 2044.29247 | 8062.06748 | 8254.32034 | 2719.30581 | 1599.4383  |
| NT-3            | 0          | 14.0534643 | 0          | 0          | 0          | 0          | 0          | 0          |
| NT-4            | 0          | 0          | 4.04600079 | 5.3565005  | 0          | 0          | 3.07888547 | 7.06856448 |
| Olfactomedin-2  | 0          | 0          | 217.228324 | 116.57513  | 0          | 0          | 0          | 0          |
| OPG             | 24.6241809 | 2.02155335 | 2.20808255 | 13.503906  | 14.8390253 | 55.0942    | 16.0101594 | 11.8451485 |
| OPN             | 3991.29872 | 8.23295998 | 0          | 79.5       | 0          | 0          | 0          | 0          |
| OSM             | 3.30019471 | 26.5931616 | 0          | 0          | 0          | 0          | 0          | 0          |
| OSM R beta      | 0          | 947.252662 | 0          | 320.119109 | 0          | 0          | 0          | 0          |
| Osteoactivin    | 51.5473223 | 274.620828 | 276.704911 | 180.421201 | 109.42653  | 436.8922   | 234.822745 | 106.781472 |
| OX40            | 0          | 0          | 0          | 0          | 0          | 0          | 0          | 0          |
| OX40 Ligand     | 0          | 0          | 0          | 0          | 0          | 0          | 0          | 0          |
| P-Cadherin      | 661.607687 | 540.820817 | 347.128807 | 240.933493 | 10428.7401 | 15316.8208 | 3711.16135 | 1283.80919 |
| p27             | 0          | 0          | 0          | 0          | 0          | 0          | 0          | 0          |
| p53             | 0          | 0          | 26.6809456 | 16.152717  | 0          | 0          | 0          | 16.6394919 |
| PAI-1           | 4581.43651 | 4923.46256 | 13277.6712 | 16326.7199 | 0          | 0          | 0          | 0          |
| PAPP-A          | 0          | 0          | 0          | 0          | 0          | 0          | 0          | 0          |
| Pappalysin-2    | 0          | 0          | 0          | 0          | 0          | 0          | 0          | 0          |
| PARC            | 105.465092 | 93.2890436 | 161.6      | 120.8      | 0          | 0          | 0          | 0          |
| PD-1            | 0          | 0          | 0          | 0          | 0          | 0          | 0          | 0          |
| PD-ECGF         | 0          | 424.554052 | 262.432488 | 396.571793 | 120.530289 | 308.630994 | 125.081196 | 127.973178 |
| PDGF Rb         | 0          | 0          | 0          | 0          | 0          | 0          | 0          | 0          |
| PDGF-AA         | 1.5576205  | 0          | 0.73691634 | 0.99817449 | 0          | 0.2811844  | 11.245506  | 3.53044229 |
| PDGF-AB         | 0          | 0          | 0          | 0          | 0          | 0          | 0          | 0          |
| PDGF-BB         | 0          | 0          | 0          | 0          | 0          | 0          | 0          | 0          |
| PDGF-CC         | 618.130762 | 378.73212  | 21.9579002 | 38.45734   | 0          | 51.0547352 | 0          | 0          |
| PECAM-1         | 0          | 0          | 0          | 0          | 0          | 0          | 0          | 0          |
| Pentraxin 3     | 1484.03986 | 1208.3399  | 956.153986 | 467.73782  | 172.710768 | 77.7959571 | 4.93886114 | 0          |
| Pepsinogen I    | 0          | 0          | 0          | 0          | 0          | 0          | 0          | 0          |
| Pepsinogen II   | 18.0298213 | 3.40334744 | 0          | 0          | 0          | 0          | 0          | 0          |
| Periostin       | 0          | 0          | 310.273061 | 40.0172598 | 47.8084158 | 72.9270398 | 14.5466823 | 0.71846769 |



|                  |            |            |            |            |            |            |            |            |
|------------------|------------|------------|------------|------------|------------|------------|------------|------------|
| SREC-I           | 16.8581578 | 35.8358123 | 78.5901247 | 17.9555013 | 16.9080689 | 83.3645407 | 61.5200195 | 0          |
| SREC-II          | 0          | 521.907252 | 558.343726 | 954.554402 | 257.525011 | 1808.21911 | 4021.60562 | 1935.87308 |
| ST2              | 0          | 0          | 62.5317623 | 0          | 0          | 2452.81503 | 2078.14378 | 0          |
| Syndecan-1       | 0          | 0          | 158.830861 | 0          | 7935.19496 | 5280.38445 | 8145.40876 | 6561.80072 |
| Syndecan-3       | 0          | 0          | 962.705991 | 0          | 0          | 0          | 0          | 0          |
| Syndecan-4       | 105.498609 | 118.65772  | 87.7986851 | 37.0986721 | 723.264096 | 769.478033 | 382.031312 | 270.06132  |
| TACE             | 0          | 0          | 276.065568 | 0          | 0          | 0          | 0          | 0          |
| TACI             | 0          | 0          | 0          | 0          | 0          | 0          | 0          | 0          |
| TARC             | 0          | 2.39170967 | 0          | 0          | 0          | 0          | 0          | 0          |
| TECK             | 16.2935358 | 0          | 0          | 0          | 0          | 0          | 0          | 0          |
| Testican 2       | 0          | 0          | 0          | 0          | 0          | 0          | 0          | 0          |
| TF               | 0          | 0.29660715 | 0          | 0          | 0.82650926 | 0          | 0          | 0          |
| TFF3             | 223.240995 | 101.20684  | 1480.71914 | 72.2273444 | 0          | 0          | 0          | 0          |
| TFPI             | 0          | 0          | 0          | 0          | 0          | 0          | 0          | 0          |
| TFPI-2           | 245.171652 | 259.030872 | 57.8493463 | 0          | 18.9116992 | 137.82353  | 97.8270429 | 3.02329443 |
| TfR              | 47.8102011 | 28.1581458 | 96.5078863 | 98.7176189 | 4.53570387 | 11.1795254 | 37.783105  | 21.3627001 |
| TGFa             | 0          | 0          | 0.05897761 | 0.01992996 | 0.38515095 | 54.3391724 | 13.2545268 | 8.35515118 |
| TGFb RIII        | 0          | 0          | 0          | 0          | 0          | 0          | 0          | 0          |
| TGFb1            | 0          | 0          | 0          | 204.725866 | 0          | 0          | 71.4248485 | 380.269101 |
| TGFb2            | 0          | 0          | 0          | 0          | 0          | 0          | 0          | 0          |
| TGFb3            | 0          | 0          | 0          | 0          | 0          | 0          | 0          | 0          |
| Thrombomodulin   | 0          | 0          | 0          | 0          | 399.019391 | 439.020407 | 546.856636 | 223.358502 |
| Thrombospondin-2 | 657.37901  | 1199.28788 | 2283.4095  | 3224.3698  | 1924.00687 | 2948.03278 | 3259.20974 | 1090.75588 |
| Thrombospondin-5 | 9.07955026 | 3.93672628 | 0          | 0          | 0          | 0          | 0          | 0          |
| Thyroglobulin    | 0          | 0          | 0          | 0          | 0          | 0          | 0          | 0          |
| Tie-1            | 0          | 1.05506295 | 0          | 0          | 0          | 0          | 0          | 0          |
| Tie-2            | 0          | 0          | 0          | 0          | 0          | 0          | 0          | 0          |
| TIM-1            | 0          | 0          | 0          | 0          | 0          | 0          | 0          | 16.9796884 |
| TIM-3            | 0          | 0          | 0          | 32.5037622 | 0          | 0          | 0          | 0          |
| TIMP-1           | 3018.79525 | 3169.58422 | 2573.41926 | 2736.50839 | 1594.78298 | 2040.81693 | 1511.71464 | 514.494657 |
| TIMP-2           | 11064.0944 | 12485.6525 | 15453.4877 | 19570.049  | 5800.1861  | 9082.95936 | 10472.3731 | 6369.68812 |
| TIMP-4           | 0          | 0          | 13.9957749 | 0          | 0          | 0          | 0          | 0          |
| TLR1             | 0          | 0          | 0          | 11.272163  | 0          | 1.00371938 | 13.4583572 | 2.61731769 |
| TLR2             | 8.51650505 | 0          | 0          | 0          | 0          | 0          | 0          | 0          |
| TLR3             | 0          | 0          | 0          | 24.359697  | 0          | 6.21574099 | 27.2144291 | 13.4405828 |
| TLR4             | 0          | 0          | 0          | 0          | 0          | 0          | 0          | 0          |
| TNF RI           | 431.375847 | 443.440847 | 1548.23673 | 1429.13393 | 231.039686 | 192.072698 | 1542.6103  | 1140.31449 |
| TNF RII          | 160.2943   | 272.976936 | 88.9790918 | 212.916073 | 0          | 0          | 48.5675935 | 43.3910174 |
| TNFa             | 96.8126007 | 42.0407103 | 0          | 1.18385817 | 7.05960151 | 3.83000481 | 32.7203596 | 15.0210995 |
| TNFb             | 72.2401254 | 52.6776921 | 0          | 0          | 16.424547  | 15.8378516 | 27.579412  | 20.6760564 |
| TPO              | 9.76944973 | 0          | 0          | 84.8573329 | 0          | 0          | 0          | 0          |
| TPP1             | 0          | 0          | 335.872546 | 491.736043 | 735.268805 | 336.026691 | 733.073041 | 172.335746 |
| TRACP            | 331.815551 | 562.430606 | 0          | 0          | 0          | 0          | 0          | 0          |
| TRAIL            | 0          | 0          | 0          | 0          | 0          | 0          | 0          | 0          |
| TRAIL R1         | 0          | 0          | 0          | 0          | 0          | 0          | 0          | 0          |
| TRAIL R2         | 0          | 0          | 0          | 0          | 0          | 0          | 0          | 0          |
| TRAIL R3         | 0          | 0          | 0          | 0          | 0          | 0          | 0          | 0          |
| TRAIL R4         | 0          | 0          | 0          | 0          | 0          | 0          | 0          | 0          |
| TRANCE           | 0          | 0          | 0          | 0          | 0          | 0          | 0          | 0          |
| Transferrin      | 4.95451027 | 6.45801077 | 2.21357262 | 0          | 320.642772 | 370.140518 | 283.986275 | 116.479945 |
| Trappin-2        | 4667.09204 | 4034.20726 | 6175.78814 | 4722.11025 | 4910.76445 | 5624.992   | 6610.75297 | 5951.23138 |
| TREM-1           | 0          | 0          | 0          | 0          | 0          | 0          | 0          | 0          |
| TREM-2           | 0          | 0          | 10.5645605 | 8.54464466 | 0          | 0          | 20.4201388 | 0          |
| TrkC             | 0          | 0          | 18.6705417 | 0          | 0          | 0          | 0          | 0          |
| Troponin I       | 0          | 0          | 0          | 0          | 0          | 0          | 0          | 0          |
| TROY             | 0          | 0          | 0          | 0          | 0          | 0          | 0          | 0          |
| TSH              | 0          | 0          | 0          | 0          | 0          | 0          | 0          | 0          |
| TSLP             | 2.24251844 | 2.98684033 | 0          | 0          | 0          | 0          | 0          | 0          |

|             |            |            |            |            |            |            |            |            |
|-------------|------------|------------|------------|------------|------------|------------|------------|------------|
| TSP-1       | 11354.9532 | 9478.71161 | 24169.158  | 7850.49676 | 8295.4935  | 19809.9776 | 16925.4904 | 5415.8719  |
| TWEAK       | 72.1869647 | 63.2900213 | 0          | 63.9762825 | 231.106491 | 300.426449 | 64.4072909 | 0          |
| TWEAK R     | 0          | 0          | 0          | 0          | 0          | 0          | 0          | 0          |
| Ubiquitin+1 | 0          | 0          | 0          | 0          | 0          | 0          | 0          | 0          |
| ULBP-1      | 0          | 0          | 0          | 0          | 0          | 0          | 0          | 0          |
| ULBP-2      | 0          | 0.58665099 | 0          | 0          | 0          | 0          | 0          | 0          |
| ULBP-3      | 0          | 0          | 0          | 0          | 0          | 0          | 0          | 0          |
| uPA         | 0          | 0          | 0          | 60.9799911 | 310.966052 | 5941.41057 | 7124.5805  | 2279.44266 |
| uPAR        | 38.9262421 | 66.2433558 | 48.7286503 | 182.113788 | 564.410285 | 1171.80194 | 590.270321 | 337.81097  |
| Uromodulin  | 0          | 0          | 146.44821  | 98.0299566 | 0          | 0          | 28.0634577 | 24.9703045 |
| VCAM-1      | 0          | 0          | 283.078474 | 0          | 0          | 0          | 60.7366627 | 0          |
| VE-Cadherin | 0          | 0          | 0          | 0          | 0          | 0          | 0          | 0          |
| VEGF        | 348.483609 | 678.363895 | 645.296414 | 646.413224 | 1883.35418 | 3091.46936 | 2435.11688 | 1539.38342 |
| VEGF R1     | 204.049977 | 0          | 545.667957 | 230.34863  | 0          | 0          | 0          | 0          |
| VEGF R2     | 0          | 0          | 12.9615232 | 5.06240316 | 0          | 0          | 0          | 8.65376235 |
| VEGF R3     | 0          | 0          | 0          | 0          | 0          | 0          | 0          | 3.47892519 |
| VEGF-C      | 0          | 0          | 0          | 0          | 0          | 0          | 0          | 0          |
| VEGF-D      | 0          | 0          | 0          | 0          | 0          | 0          | 0          | 0          |
| Vitronectin | 2248.05174 | 982.375575 | 713.666491 | 1887.04865 | 206.770138 | 76.2869182 | 41.3260457 | 26.3839976 |
| vWF         | 0          | 37.6773712 | 929.292933 | 0          | 192.577338 | 276.434598 | 118.467768 | 0          |
| WIF-1       | 150.471782 | 156.092501 | 686.461016 | 211.324495 | 0          | 126.091829 | 92.3919129 | 0          |
| WISP-1      | 0          | 0          | 0          | 0          | 0          | 0          | 0          | 0          |
| XEDAR       | 0          | 12.017968  | 0          | 0          | 0          | 12.6356114 | 0          | 0          |
| XIAP        | 0          | 0          | 0          | 0          | 0          | 659.647774 | 0          | 0          |
